# Supplementary material for: The tumor suppressor RASSF10 is upregulated upon contact inhibition and frequently epigenetically silenced in cancer
Source: PubMed Central journal article supplement — Oncogenesis. 2012 Jun 25;1(6):e18–. doi: 10.1038/oncsis.2012.18 (PMC3412644; doi:10.1038/oncsis.2012.18), 2012-06-25
Supplement: oncsis201218x1.pdf [file oncsis201218x1.pdf]

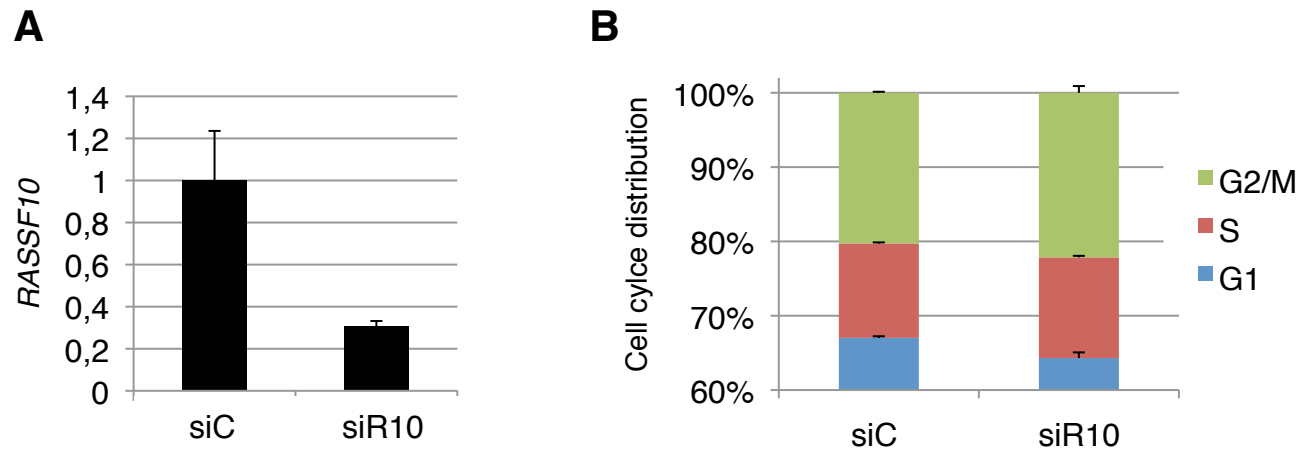

**Fig. S1** RASSF10 knockdown increases rate of cells entering mitosis and decreases cells in G1. In A549 cells knockdown of RASSF10 by siRNA was performed and DNA content was determined by propidium iodide staining using FACS analysis (FACSCanto, BDBiosciences, Heidelberg, Germany). A) The knockdown of *RASSF10* was verified by RT-PCR and normalised to *ACTB*. B) Distribution of cells in the different stages of the cell cycle is shown (blue = G1, red = S and green = G2 and mitosis). Experiment was performed in triplicate and representative result is shown. A549 cells were transfected with siRNA. After 4 d cells were ethanol fixed overnight at -20°C. Then cells were 50 µg/ml RNase A treated for 30 min at 37°C and stained with 50 µg/ml propidium iodide to measure DNA content of cells with FACS Cantoll (BDBiosciences, Heidelberg, Germany). Data was analyzed with FACSDiva Version 6.1.2.

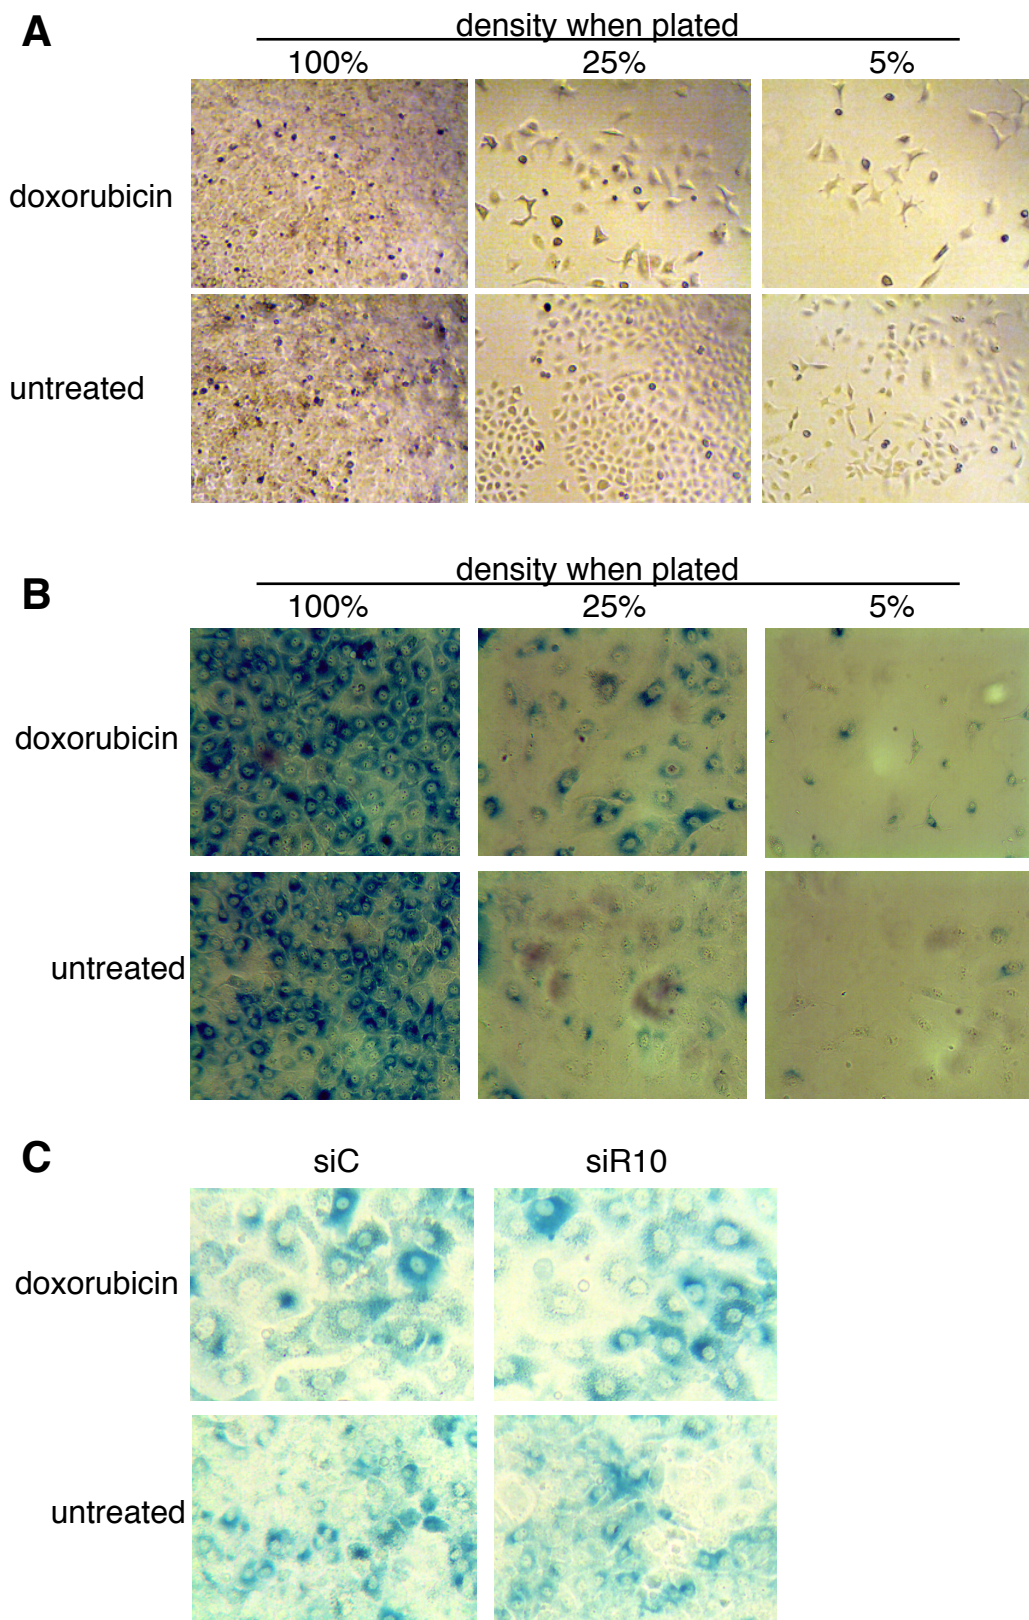

**Fig. S2** Senescence-associated  $\beta$ -galactosidase staining is associated with increasing cellular density and doxorubicin treatment. A) Confocal microscopy of B) senescence associated  $\beta$ -galactosidase staining of doxorubicin treated A549 was performed. A549 cells were plated at indicated densities and left untreated or 200 nM doxorubicin treated for 72 h. Cells were fixed with 3.7% formaldehyde and stained for  $\beta$ -galactosidase activity (blue) overnight and embedded in MOWIOL before microscopy. Matching experiment is found in figure 5C. C) Senescence associated  $\beta$ -galactosidase staining of doxorubicin treated A549 after knockdown of RASSF10 is depicted. A549 were transfected with siRNA against RASSF10 (siR10) or Control (siC). After 24 h cells were treated with doxorubicin for another 72 h. Cells were fixed with 3.7% formaldehyde and stained for  $\beta$ -galactosidase activity (blue) overnight and embedded in MOWIOL before microscopy. Matching experiment is found in figure 5D.

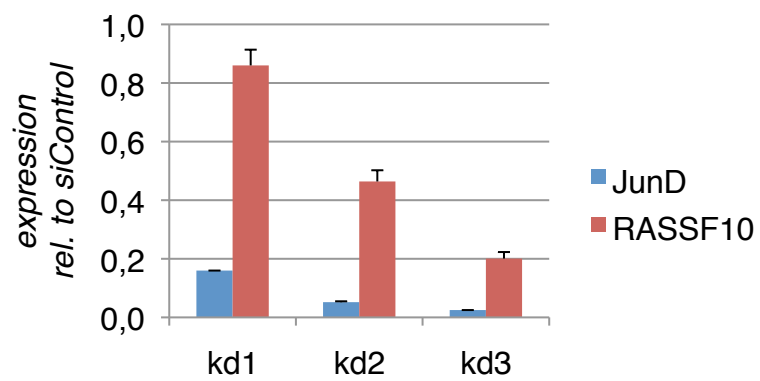

**Fig. S3** JunD knockdown correlates dose dependently with downregulation of *RASSF10*. Three independent experiments (kd1-3) for knockdown of JunD and siControl were performed and analysed by qRT-PCR for *JunD* (blue), *RASSF10* (red) and *ACTB* expression. Results were normalised to *ACTB*. QRT-PCR was performed in triplicate and according SD is indicated. SiControl was set 1 for each experiment and relative *JunD* and *RASSF10* expression under siJunD are depicted. Matching experiment found in 5F.

**Table S1** Cell lines analysed for *RASSF10* methylation

| lung cancer cell lines          |       | cell line | R10 methylation |
|---------------------------------|-------|-----------|-----------------|
|                                 | NSCLC | H322      | m               |
|                                 |       | H358      | u               |
|                                 |       | HCC15     | pm              |
|                                 |       | HCC366    | u               |
|                                 |       | H1299     | pm              |
|                                 |       | A549      | u               |
|                                 |       | A427      | pm              |
|                                 | SCLC  | HTB171    | pm              |
|                                 |       | HTB175    | pm              |
|                                 |       | HTB173    | pm              |
|                                 |       | CRL2062   | u               |
|                                 |       | HTB184    | u               |
|                                 |       | CRL5869   | pm              |
|                                 |       | CRL5808   | pm              |
|                                 |       | CRL5886   | pm              |
|                                 |       | CRL5840   | pm              |
|                                 |       | CRL5976   | pm              |
|                                 |       | CRL5831   | u               |
|                                 |       | CCL257    | u               |
|                                 |       | HTB180    | m               |
|                                 |       | CRL2066   | pm              |
|                                 |       | CRL5898   | pm              |
| head and neck cancer cell lines |       |           |                 |
|                                 |       | UM-SCC    | u               |
|                                 |       | RPMI      | m               |
|                                 |       | Hep2      | pm              |
| sarcoma cell lines              |       |           |                 |
|                                 |       | LMS6-93   | pm              |
|                                 |       | SKLMS     | pm              |
|                                 |       | A204      | pm              |
|                                 |       | RD        | pm              |
|                                 |       | U2OS      | pm              |
| pancreas cancer cell lines      |       |           |                 |
|                                 |       | PATU-S    | pm              |
|                                 |       | PATU-T    | pm              |
|                                 |       | PATU-02   | pm              |
|                                 |       | Capan1    | u               |
|                                 |       | Capan2    | m               |
|                                 |       | HUP-T3    | u               |
|                                 |       | HUP-T4    | u               |
|                                 |       | PaCa2     | m               |

NSCLC: non small cell lung cancer; SCLC: small cell lung cancer;  
m = methylated, pm= partially, methylated, u = unmethylated;

**Table S2** Primers utilised for COBRA, pyrosequencing, RT-PCR and promoter studies

| <b>COBRA PCR</b>                  |                                                                                |
|-----------------------------------|--------------------------------------------------------------------------------|
| RASSF10                           | 5'-ATAAGTAGAGGAGTTAGTAGGTTAAAGGAGA-3'<br>5'-AAATACAAAAAACTCAAACCCCAAACCC-3'    |
| RASSF10USEQ                       | 5'-GTGGAGGGATTTTTGAATTTTTTTT -3'                                               |
| <b>RT-PCR</b>                     |                                                                                |
| ACTB                              | 5'-CCTTCCTTCCTGGGCATGGAGTC-3'<br>5'-CGGAGTACTTGCGCTCAGGAGGA-3'                 |
| 28SrRNA                           | 5'-GCAGGGCGAAGCCAGAGGAAACT-3'<br>5'-CGAGAGCGCCAGCTATCCTGAGG-3'                 |
| RASSF10                           | 5'-GCGCCATGGATCCTTCGGAAAA-3'<br>5'-GGCAGCGCCTCGTCGTCGTCCT-3'                   |
| p27                               | 5'-GTGCGAGAGAGGCGGTCGTG-3'<br>5'-TCCACCGGGCCGAAGAGGTT-3'                       |
| p21                               | 5'-CCTTGTGCCTCGCTCAGGGGAG-3'<br>5'-GGCCCTCGCGCTTCCAGGAC-3'                     |
| JunD                              | 5'-CGCATCTCGCGCCTGGAAGA-3'<br>5'-GGACTCAGTACGCGGGCACC-3'                       |
| Fra2                              | 5'-GCGGCGGCCAGCAGAAATTC-3'<br>5'-GGACAGAGGCCAGGCCCGG-3'                        |
| <b>RASSF10 promoter construct</b> |                                                                                |
| R10wt                             | 5'-AGATCTTGTGACTTGGGTCTGGGCCCTGAA-3'<br>5'-GGTTGCGCCATGGATCCTTCG-3'            |
| del -271 to +157                  | 5'-AGATCTTGTGACTTGGGTCTGGGCCCTGAA-3'<br>5'-GCCGAGACTCAGGATGCCTGCAATGGATCCG-3'  |
| del -900 to -776                  | 5'-CTCACATGGCTCGACAGCCGCCTCTGAAGG-3'<br>5'-CCTTCAGAGGCGGCTGTGAGCCATGTGAG-3'    |
| del -775 to -502                  | 5'-CTACAGGGAACGGGCAAATGCGTCTGGGGG-3'<br>5'-CCCCAGACGCATTTGCCCGTTCCTGTAG-3'     |
| del -501 to -273                  | 5'-CGAGGGACCAGGGCGAGCGAGGGG-3'<br>5'-CCCCTCGCTCGCCCTGGTCCCTCG-3'               |
| del -272 to -218                  | 5'-AGACTCAGGATGCCTGCAATCTGGGCCCTGA-3'<br>5'-TCAGGGCCCAGATTGCAGGCATCCTGAGTCT-3' |
| del -217 to -106                  | 5'-GAGGGGCGGGCAGCCAGAGCGG-3'<br>5'-CCGCTCTGGCTGCCCGCCCTC-3'                    |
| del -105 to -6                    | 5'-GCACCTTGGGCAGCCAGCCTGCCTTC-3'<br>5'-GAAGGCAGGCTGGCTGCCCAAGGTGC-3'           |

**Table S3** The histopathologic, clinical and *RASSF10* methylation data of 49 soft tissue sarcoma patients

| Patients' characteristics   | No. of cases | RASSF10      |            |
|-----------------------------|--------------|--------------|------------|
|                             |              | unmethylated | methylated |
| Total                       | 46           | 38           | 8          |
| Sex                         |              |              |            |
| Male                        | 17           | 15           | 2          |
| Female                      | 29           | 23           | 6          |
| Histological subtype        |              |              |            |
| LS                          | 12           | 11           | 1          |
| MFH                         | 13           | 11           | 2          |
| FS                          | 1            | 1            | 0          |
| RMS                         | 4            | 1            | 3          |
| LMS                         | 9            | 7            | 2          |
| NS                          | 4            | 4            | 0          |
| Syn                         | 1            | 1            | 0          |
| Other                       | 2            | 2            | 0          |
| Tumour stage                |              |              |            |
| I                           | 8            | 8            | 0          |
| II                          | 17           | 15           | 2          |
| III                         | 15           | 10           | 5          |
| IV                          | 6            | 5            | 1          |
| Complete resection          |              |              |            |
| Radical (R0)                | 34           | 28           | 6          |
| Not radical (R1)            | 12           | 10           | 2          |
| Location                    |              |              |            |
| Extremities                 | 31           | 25           | 6          |
| Trunk wall                  | 3            | 2            | 1          |
| Abdomen/<br>retroperitoneum | 10           | 9            | 1          |
| Multiple locations          | 2            | 2            | 0          |
| Patient status              |              |              |            |
| Alive                       | 26           | 20           | 6          |
| Dead                        | 20           | 18           | 2          |

LS-liposarcoma, MFH-malignant fibrous histiocytoma, FS-fibrosarcoma, RMS-rhabdomyosarcoma, LMS-leiomyosarcoma, NS-neuronal sarcoma, Syn-synovial sarcoma
